# Supplementary material for: Diversity of the Epsilonproteobacteria Dsb (disulfide bond) systems
Source: Front Microbiol. 2015 Jun 9;6:570. doi: 10.3389/fmicb.2015.00570 (PMC4460558; doi:10.3389/fmicb.2015.00570)
Supplement: Table S1 — Distribution of Dsb-like and associated proteins (with their accession numbers) in Arcobacter spp., Campylobacter spp., Helicobacter spp., and the Wolinella succinogenes DSM 1740 proteomes. [file Table1.XLSX]

## Sheet: Arkusz1
		oxidative pathway
										cytochrome C biosynthesis pathway
	strain	DsbA1	DsbA2	DsbB	AstA	Dba	HP0231	HP0595/DsbI	DsbC	DsbD	HP0265/CcdA	CcmG	HP0377	CcsB
Arcobacter	A. butzleri 7h1h	–	–	–	–	–	–	–	YP_008330243	YP_008331993	–	YP_008331383 (motif CPPC IP) YP_008330834 (motif CPPC IP)	–	YP_008330303 YP_008331227
	A. butzleri ED-1	–	–	–	–	–	–	–	YP_005537794	YP_005539509	–	YP_005538369 (motif CPPC IP) YP_005538879 (motif CPPC IP)	–	YP_005537848 YP_005538745
	A. butzleri RM4018	–	–	–	–	–	–	–	YP_001489228	YP_001491071	–	YP_001490372 (motif CPPC IP) YP_001489819 (motif CPPC IP)	–	YP_001489290 YP_001490230
	A. nitrofigilis DSM 7299	–	–	–	–	–	–	–	ADG94382	ADG94539	–	ADG92986 (motif CPPC IP) ADG93859 (motif CPIC FP) ADG93748 (motif CLPC IP)	–	ADG93271
Campylobacter	C. coli 15-537360	AGZ21298 (motif CIHC TP)	–	AGZ21299	–	AGZ20516	–	AGZ20515	AGZ21760	AGZ21039	–	AGZ21972 (motif CGPC IP) AGZ20580 (motif CPSC TP)	–	AGZ21388
	C. coli CVM N29710	AGV09983 (motif CIHC TP)	–	AGV09982	–	AGV09160	–	AGV09159	AGV09518	AGV10246	–	AGV10615 (motif CGPC IP) AGV09233 (motif CPSC TP)	–	AGV09890
	C. coli RM1875	AHK73297 (motif CIHC TP)	–	AHK73296	–	AHK72418	–	AHK72417	AHK72758	AHK73567	–	AHK72486 (motif CPSC TP) AHK74040 (motif CGPC IP)	–	AHK73136
	C. coli RM4661	AHK76820 (motif CIHC TP)	–	AHK76821	–	AHK76008	–	AHK76007	AHK77330	AHK76486	–	AHK76073 (motif CPSC TP) AHK77159 (motif CSPC IP)	–	AHK76966
	C. coli RM5611	AHK75123 (motif CIHC TP)	–	AHK75122	–	AHK74313	–	AHK74312	AHK74661	AHK75392	–	AHK74378 (motif CPSC TP) AHK74835 (motif CSPC IP)	–	AHK75032
	C. concisus 13826	EAT98438 (motif CPHC VP)	EAT97566 (motif CPFC VP)	EAT97567	EAT98360 EAT97342	–	–	–	EAT98880	EAT98761	–	EAT97311 (motif CPPC LP) EAT98537 (motif CGPC IP) EAT98813 (motif CGVC VP) EAT97789 (motif CPPC LP)	–	EAT97581 EAT99176
	C. curvus 525.92	EAU01124 (motif CQHC VP)	EAT99819 (motif CPFC VP)	EAT99816	EAT99814 EAU01148	present, but not distinguished	–	EAU01029	EAU01401	EAU00243	–	EAU00469 (motif CPPC LP)	–	EAU01270
	C. fetus subsp. fetus 04/554	AIR79524 (motif CIHC TP)	AIR78378 (motif CPFC VP)	AIR78379	AIR78380	AIR79506	–	AIR79505	AIR79420	AIR78974	–	AIR78437 (motif CPPC IP)	–	AIR78350
	C. fetus subsp. fetus 82-40	ABK81932 (motif CIHC TP)	ABK82313 (motif CPFC VP)	ABK82964	ABK81991	ABK82059	–	ABK83327	ABK82276	ABK83012	–	ABK81808 (motif CPPC IP)	–	ABK83043
	C. fetus subsp. testudinum 03-427	AGZ82459 (motif CIHC TP)	AGZ81329 (motif CPFC VP)	AGZ81330	AGZ81332	AGZ82441	–	AGZ82440	AGZ82350	AGZ81925	–	AGZ81390 (motif CPPC IP)	–	AGZ81300
	C. hominis ATCC BAA-381	–	–	ABS52551	–	–	–	–	ABS52555	ABS51957	–	ABS52406 (motif CGAC IP)	–	ABS52264
	C. jejuni 32488	AGQ95857 (motif CIHC TP)	truncated gene AGQ95851	AGQ95497	truncated gene (AGQ95852 AGQ95853 AGQ95854 AGQ95855 AGQ95856)	AGQ94827	–	AGQ94826	AGQ94547	AGQ95292	–	AGQ94417 (motif CTPC IP)	–	AGQ94253
	C. jejuni 4031	CDH62703 (motif CIHC TP)	CDH62700 (motif CTHC TP)	CDH62701	CDH62702	CDH6185	–	CDH61856	CDH63204	CDH62452	–	CDH63042 (motif CTPC IP) CDH61979 (motif CGPC IP)	–	CDH62841
	C. jejuni RM1221	AAW35290 (motif CIHC TP)	AAW35288 (motif CTHC TP)	AAW35289	truncated and not distinguished gene	AAW34513	–	AAW34512	AAW36006	AAW35784	–	AAW35662 (motif CTPC IP) AAW34738 (motif CGPC IP)	–	AAW35483
	C. jejuni subsp. doylei 269.97	ABS44689 (motif CIHC TP)	ABS43668 (motif CTYC TP)	ABS43161	truncated and not distinguished gene	ABS43948	–	ABS43164	ABS44053	ABS44041	–	ABS43489 (motif CTPC IP)	–	ABS43237
	C. jejuni subsp. jejuni 00-2425	AGV56658 (motif CIHC TP)	truncated gene AGV56656	AGV56657	truncated gene (AIR73554 AIR73555 AIR73556 AIR73557)	AGV55819	–	AGV55818	AGV57193	AGV56425	–	AGV56971 (motif CTPC IP) AGV56043 (motif CGPC IP)	–	AGV56782
	C. jejuni subsp. jejuni 00-2426	AGV51167 (motif CIHC TP)	truncated gene AGV51162	AGV51163	truncated gene (AIR73310 AGV51164 AIR73309 AIR73308)	AIR73283	–	AGV50352	AGV51685	AGV50915	–	AGV51484 (motif CTPC IP) AGV50473 (motif CGPC IP)	–	AGV51297
	C. jejuni subsp. jejuni 00-2538	AGV49493 (motif CIHC TP)	truncated gene AGV49488	AGV49489	truncated gene (AIR73223 AGV49490 AIR73222 AIR73221)	AIR73181	–	AGV48639	AGV50006	AGV49244	–	AGV49807 (motif CTPC IP) AGV48758 (motif CGPC IP)	–	AGV49621
	C. jejuni subsp. jejuni 00-2544	AGV47730 (motif CIHC TP)	truncated gene AGV47725	AGV47726	truncated gene (AIR73409 AGV47727 AIR73408 AIR73407)	AIR73365	–	AGV46876	AGV48246	AGV47482	–	AGV48046 (motif CTPC IP) AGV47050 (motif CGPC IP)	–	AGV47859
	C. jejuni subsp. jejuni 81116	ABV52413 (motif CIHC TP)	ABV52410 (motif CTHC TP)	ABV52411	ABV52412	ABV51618	–	ABV51617	ABV52896	ABV52164	–	ABV51743 (motif CGPC IP) ABV52749 (motif CTPC IP) ABV53163 (motif CPSC TP)	ABV51632 (motif CVYC TP)	ABV52549 ABV51633
	C. jejuni subsp. jejuni 81-176	EAQ72294 (motif CIHC TP)	EAQ72389 (motif CTHC TP)	EAQ72274	EAQ72360	EAQ71971	–	EAQ71919	EAQ72871	EAQ73386	–	EAQ72143 (motif CTPC IP) EAQ73309 (motif CGPC IP)	EAQ71952 (motif CVYC TP)	EAQ72089 EAQ72011
	C. jejuni subsp. jejuni IA3902	ADC28461 (motif CIHC TP)	truncated gene ADC28459	ADC28460	truncated and not distinguished gene	ADC27673	–	ADC27672	ADC28952	ADC28216	–	ADC28783 (motif CTPC IP)	–	ADC28595
	C. jejuni subsp. jejuni ICDCCJ07001	ADT66191 (motif CIHC TP)	ADT66188 (motif CTHC TP)	ADT66189	ADT66190	present, but not distinguished	–	ADT65445	ADT66636	ADT65936	–	ADT66488 (motif CTPC IP) ADT65567 (motif CGPC IP) ADT66875 (motif CPSC TP)	ADT65459 (motif CVYC TP)	ADT65460 truncated gene (ADT66317 ADT66318 ADT66319)
	C. jejuni subsp. jejuni M1	ADN91047 (motif CIHC TP)	ADN91043 (motif CTHC TP)	ADN91044	truncated gene (ADN91045 ADN91046)	present, but not distinguished	–	ADN90250	ADN91531	ADN90792	–	ADN91382 (motif CTPC IP) ADN90378 (motif CGPC IP)	ADN90264 (motif CVYC TP)	ADN91182 ADN90265
	C. jejuni subsp. jejuni NCTC 11168 = ATCC 700819	CAL34995 (motif CIHC TP)	truncated gene CAL34992	CAL34993	truncated and not distinguished gene	CAL34199	–	CAL34198	CAL35492	CAL34749	–	CAL35322 (motif CTPC IP)	–	CAL35131
	C. jejuni subsp. jejuni NCTC 11168-BN148	CCK66972 (motif CIHC TP)	truncated gene CCK66969	CCK66970	truncated and not distinguished gene	CCK66176	–	CCK66175	CCK67469	CCK66726	–	CCK67299 (motif CTPC IP) CCK66295 (motif CGPC IP)	–	CCK67108
	C. jejuni subsp. jejuni PT14	AFU42940 (motif CIHC TP)	truncated gene AFU42938	AFU42939	truncated and not distinguished gene	AFU42156	–	AFU42155	AFU43418	AFU42705	–	AFU43256 (motif CTPC IP) AFU42281 (motif CGPC IP) AFU43666 (motif CPSC TP)	–	AFU43067
	C. jejuni subsp. jejuni R14	AHW91915 (motif CIHC TP)	truncated gene AHW91913	AHW91914	truncated and not distinguished gene	AHW90981	–	AHW90980	AHW92396	AHW91688	–	AHW92234 (motif CTPC IP) AHW91105 (motif CGPC IP)	–	AHW92055
	C. jejuni subsp. jejuni S3	ADT72645 (motif CIHC TP)	ADT72643 (motif CTHC TP)	ADT72644	truncated and not distinguished gene	ADT71788	–	ADT71787	ADT73182	ADT72346	–	ADT72968 (motif CTPC IP) ADT71916 (motif CGPC IP) ADT73443 (motif CPSC TP)	–	ADT72785
	C. jejuni subsp. jejuni strain MTVDSCj20	AII24587 (motif CIHC TP)	AII24584 (motif CTHC TP)	AII24585	AII24586	AII23772	–	AII23771	AII25052	AII24346	–	AII23894 (motif CGPC IP) AII24910 (motif CTPC IP)	AII23786 (motif CVYC TP)	AII24715 AII23787
	C. lari RM2100	–	ACM63893 (motif CIHC TP)	–	ACM63894	–	–	ACM64816 ACM64661	ACM64605	ACM64231	ACM64231	–	ACM64135 (motif CLYC TP)	ACM64438 ACM64136
Helicobacter	H. acinonychis Sheeba	–	–	–	–	CAK00145	CAJ99150 (motif CPHC VP)	CAK00144	–	–	CAJ99345	–	CAJ99315 (motif CSYC TP)	CAJ99314
	H. cetorum MIT 00-7128	–	–	–	–	AFI04454	AFI04613 (motif CPHC VP)	AFI04455	–	–	AFI04257	–	AFI04240 (motif CSYC TP)	AFI04239
	H. cetorum MIT 99-5656	–	–	–	–	AFI05288	AFI06415 (motif CPHC VP)	AFI05287	–	–	AFI05498	–	AFI06495 (motif CSYC TP)	AFI06496
	H. cinaedi ATCC BAA-847	–	–	–	–	–	BAM33554 (motif CPSC VP) BAM32421 (motif CPYC VP)	–	–	–	BAM32218	–	BAM31378 (motif CIYC TP)	BAM31377
	H. cinaedi PAGU611	–	–	–	–	–	BAM13212 (motif CPSC VP) BAM12057 (motif CPYC VP)	–	–	–	BAM12227	–	BAM11456 (motif CIYC TP)	BAM11455
	H. felis ATCC 49179	–	–	–	–	CBY82363	CBY82739 (motif CPHC VP)	CBY82364	–	–	CBY82342	–	CBY82260 (motif CSYC TP)	CBY82259
	H. hepaticus ATCC 51449	–	–	–	–	–	AAP77738 (motif CPSC VP) AAP78009 (motif CPYC VP)	–	–	–	AAP78364	–	AAP77594 (motif CTYC TP)	AAP77595
	H. mustelae 12198	–	–	–	–	–	CBG39340 (motif CPHC VP) CBG40501 (motif CSFC VP)	–	–	–	CBG40554	–	CBG39391 (motif CSYC TP)	CBG39390
	H. pylori 2017	–	–	–	–	ADZ49675	ADZ49320 (motif CPHC VP)	ADZ49676	–	–	ADZ49354	–	ADZ50140 (motif CSYC TP)	ADZ50139
	H. pylori 2018	–	–	–	–	ADZ51277	ADZ50919 (motif CPHC VP)	ADZ51278	–	–	ADZ50955	–	ADZ51748 (motif CSYC TP)	ADZ51747
	H. pylori 26695	–	–	–	–	AAD07666	AAD07309 (motif CPHC VP)	AAD07664	–	–	AAD07331	–	AAD07445 (motif CSYC TP)	AAD07446
	H. pylori 35A	–	–	–	–	ADU41102	ADU40608 (motif CPHC VP)	ADU41101	–	–	ADU40640	–	ADU41348 (motif CSYC TP)	ADU41347
	H. pylori 51	–	–	–	–	ACX97929	ACX97444 (motif CPHC VP)	ACX97928	–	–	ACX97477	–	ACX98176 (motif CSYC TP)	ACX98175
	H. pylori 52	–	–	–	–	ACX99343	ACX98853 (motif CPHC VP)	ACX99342	–	–	ACX98886	–	ACX99575 (motif CSYC TP)	ACX99574
	H. pylori 83	–	–	–	–	AEE70425	AEE69890 (motif CPHC VP)	AEE70424	–	–	AEE69923	–	AEE70695 (motif CHYC TP)	AEE70694
	H. pylori 908	–	–	–	–	ADN79732	ADN79374 (motif CPHC VP)	ADN79733	–	–	ADN79409	–	ADN80193 (motif CSYC TP)	ADN80192
	H. pylori Aklavik117	–	–	–	–	AFX90974	AFX90647 (motif CPHC VP)	AFX90975	–	–	AFX90679	–	AFX91402 (motif CSYC TP)	AFX91401
	H. pylori Aklavik86	–	–	–	–	AFX89424	AFX90260 (motif CPHC VP)	AFX89425	–	–	AFX89523	–	AFX90097 (motif CSYC TP)	AFX90098
	H. pylori B38	–	–	–	–	CAX29309	CAX28780 (motif CPHC VP_	CAX29308	–	–	CAX28815	–	CAX29561 (motif CSYC TP)	CAX29560
	H. pylori B8	–	–	–	–	CBI66349	CBI66891 (motif CPHC VP)	CBI66350	–	–	CBI66854	–	CBI65982 (motif CSYC TP)	CBI65983
	H. pylori BM012A	–	–	–	–	AHA88246	AHA87931 (motif CPHC VP)	AHA88247	–	–	AHA87962	–	AHA88722 (motif CSYC TP)	AHA88721
	H. pylori BM012B	–	–	–	–	present, but not distinguished	AHZ28144 (motif CPHC VP)	AHZ28436	–	–	AHZ28175	–	AHZ28884 (motif CSYC TP)	AHZ28883
	H. pylori BM012S	–	–	–	–	AHA89819	AHA89503 (motif CPHC VP)	AHA89820	–	–	AHA89534	–	AHA90296 (motif CSYC TP)	AHA90295
	H. pylori BM013A	–	–	–	–	present, but not distinguished	AHZ26390 (motif CPHC VP)	AHZ26684	–	–	AHZ26421	–	AHZ27089 (motif CSYC TP)	AHZ27088
	H. pylori BM013B	–	–	–	–	present, but not distinguished	AHZ29316 (motif CPHC VP)	AHZ29610	–	–	AHZ29347	–	AHZ30014 (motif CSYC TP)	AHZ30013
	H. pylori Cuz20	–	–	–	–	ADO03814	ADO03473 (motif CPHC VP)	ADO03815	–	–	ADO03506	–	ADO04241 (motif CHYC TP)	ADO04240
	H. pylori ELS37	–	–	–	–	AFF20266	AFF20646 (motif CPHC VP)	AFF20265	–	–	AFF20614	–	AFF19832 (motif CSYC TP)	AFF19833
	H. pylori F16	–	–	–	–	BAJ55362	BAJ54836 (motif CPHC VP)	BAJ55361	–	–	BAJ54869	–	BAJ55617 (motif CSYC TP)	BAJ55616
	H. pylori F30	–	–	–	–	BAJ56830	BAJ57161 (motif CPHC VP)	BAJ56829	–	–	BAJ57128	–	BAJ56407 (motif CHYC TP)	BAJ56408
	H. pylori F32	–	–	–	–	BAJ58151	BAJ57822 (motif CPHC VP)	BAJ58152	–	–	BAJ57856	–	BAJ57909 (motif CSYC TP)	BAJ57910
	H. pylori F57	–	–	–	–	BAJ59693	BAJ59324 (motif CPHC VP)	BAJ59694	–	–	BAJ59392	–	BAJ60114 (motif CHYC TP)	BAJ60113
	H. pylori G27	–	–	–	–	ACI27314	ACI26978 (motif CPHC VP)	ACI27315	–	–	ACI27011	–	ACI27773 (motif CSYC TP)	ACI27772
	H. pylori Gambia94/24	–	–	–	–	ADU81451	ADU81111 (motif CPHC VP)	ADU81452	–	–	ADU81146	–	ADU81897 (motif CSYC TP)	ADU81896
	H. pylori HPAG1	–	–	–	–	ABF84641	ABF84301 (motif CPHC VP)	ABF84642	–	–	ABF84334	–	ABF85082 (motif CSYC TP)	ABF85081
	H. pylori HUP-B14	–	–	–	–	AFI07443	AFI06939 (motif CPHC VP)	AFI07442	–	–	AFI06973	–	AFI07692 (motif CFYC TP)	AFI07691
	H. pylori India7	–	–	–	–	ADU79970	ADU79461 (motif CPHC VP)	ADU79969	–	–	ADU79495	–	ADU80266 (motif CSYC TP)	ADU80265
	H. pylori J166	–	–	–	–	present, but not distinguished	AHZ24942 (motif CPHC VP)	AHZ25455	–	–	AHZ24975	–	AHZ25738 (motif CSYC TP)	AHZ25737
	H. pylori J99	–	–	–	–	AAD06113	AAD05803 (motif CPHC VP)	AAD06114	–	–	AAD05826	–	AAD06581 (motif CSYC TP)	AAD06582
	H. pylori Lithuania75	–	–	–	–	ADU83016	ADU82683 (motif CPHC VP)	ADU83017	–	–	ADU82715	–	ADU83458 (motif CSYC TP)	ADU83457
	H. pylori OK113	–	–	–	–	BAM96519	BAM96148 (motif CPHC VP)	BAM96520	–	–	BAM96182	–	BAM96946 (motif CHYC TP)	BAM96945
	H. pylori OK310	–	–	–	–	BAM98170	BAM97664 (motif CPHC VP)	BAM98169	–	–	BAM97697	–	BAM98403 (motif CHYC TP)	BAM98402
	H. pylori oki102	–	–	–	–	AHN34769	AHN34295 (motif CPHC VP)	AHN34768	–	–	present, but not distinguished	–	AHN35034 (motif CSYC TP)	AHN35033
	H. pylori oki112	–	–	–	–	AHN36246	AHN35764 (motif CPHC VP)	AHN36245	–	–	AHN35795	–	AHN36513 (motif CSYC TP)	AHN36512
	H. pylori oki128	–	–	–	–	AHN37488	AHN37209 (motif CPHC VP)	AHN37489	–	–	AHN37241	–	AHN37878 (motif CSYC TP)	AHN37877
	H. pylori oki154	–	–	–	–	AHN38924	AHN38607 (motif CPHC VP)	AHN38925	–	–	AHN38639	–	AHN39318 (motif CSYC TP)	AHN39317
	H. pylori oki422	–	–	–	–	AHN40549	AHN40074 (motif CPHC VP)	AHN40548	–	–	AHN40105	–	AHN40811 (motif CSYC TP)	AHN40810
	H. pylori oki673	–	–	–	–	AHN41827	AHN41514 (motif CPHC VP)	AHN41828	–	–	AHN41546	–	AHN42217 (motif CSYC TP)	AHN42216
	H. pylori oki898	–	–	–	–	AHN44912	AHN44431 (motif CPHC VP)	AHN44911	–	–	AHN44464	–	AHN45183 (motif CSYC TP)	AHN45182
	H. pylori P12	–	–	–	–	ACJ07754	ACJ07390 (motif CPHC VP)	ACJ07755	–	–	ACJ07422	–	ACJ08196 (motif CSYC TP)	ACJ08195
	H. pylori PeCan18	–	–	–	–	AFI02344	AFI02022 (motif CPHC VP)	AFI02345	–	–	AFI02055	–	AFI02798 (motif CSYC TP)	AFI02797
	H. pylori PeCan4	–	–	–	–	ADO06833	ADO06483 (motif CPHC VP)	ADO06834	–	–	ADO06516	–	ADO07259 (motif CHYC TP)	ADO07258
	H. pylori Puno120	–	–	–	–	AEN15207	AEN14878 (motif CPHC VP)	AEN15208	–	–	AEN14910	–	AEN15637 (motif CHYC TP)	AEN15636
	H. pylori Puno135	–	–	–	–	AEN18285	AEN17944 (motif CPHC VP)	AEN18286	–	–	AEN17977	–	AEN18766 (motif CSYC TP)	AEN18765
	H. pylori Rif1	–	–	–	–	AFV43407	AFV43048 (motif CPHC VP)	AFV43408	–	–	AFV43082	–	AFV43192 (motif CSYC TP)	AFV43193
	H. pylori Rif2	–	–	–	–	AFV45000	AFV44643 (motif CPHC VP)	AFV45001	–	–	AFV44676	–	AFV44785 (motif CSYC TP)	AFV44786
	H. pylori Sat464	–	–	–	–	ADO05503	ADO04980 (motif CPHC VP)	ADO05502	–	–	ADO05014	–	ADO05748 (motif CHYC TP)	ADO05747
	H. pylori Shi112	–	–	–	–	AFI01012	AFI00511 (motif CPHC VP)	AFI01011	–	–	AFI00546	–	AFI01262 (motif CHYC TP)	AFI01261
	H. pylori Shi169	–	–	–	–	AFH99310	AFH98965 (motif CPHC VP)	AFH99311	–	–	AFH99002	–	AFH99732 (motif CHYC TP)	AFH99731
	H. pylori Shi417	–	–	–	–	AFH97725	AFH97388 (motif CPHC VP)	AFH97726	–	–	AFH97423	–	AFH98151 (motif CHYC TP)	AFH98150
	H. pylori Shi470	–	–	–	–	ACD48215	ACD47694 (motif CPHC VP)	ACD48214	–	–	ACD47728	–	ACD48515 (motif CHYC TP)	ACD48514
	H. pylori SJM180	–	–	–	–	ADO02193	ADO01852 (motif CPHC VP)	ADO02194	–	–	ADO01884	–	ADO02632 (motif CHYC TP)	ADO02631
	H. pylori SNT49	–	–	–	–	AEN16770	AEN16440 (motif CPHC VP)	AEN16771	–	–	AEN16473	–	AEN17204 (motif CSYC TP)	AEN17203
	H. pylori SouthAfrica20	–	–	–	–	AGT73848	AGT73499 (motif CPHC VP)	AGT73849	–	–	truncated gene (AGT73537 AGT73536)	–	AGT74366 (motif CAYC TP)	AGT74365
	H. pylori SouthAfrica7	–	–	–	–	ADU84562	ADU84258 (motif CPHC VP)	ADU84563	–	–	ADU84293	–	ADU85021 (motif CAYC TP)	ADU85020
	H. pylori UM032	–	–	–	–	present, but not distinguished	AGL66171 (motif CPHC VP)	AGL67192	–	–	AGL66136	–	AGL66927 (motif CSYC TP)	AIN76146
	H. pylori UM037	–	–	–	–	AGL69994	AGL70395 (motif CPHC VP)	AGL69995	–	–	AGL69532	–	AGL70323 (motif CSYC TP)	AGL70322
	H. pylori UM066	–	–	–	–	AGL71294	AGL71811 (motif CPHC VP)	AGL71295	–	–	AGL71778	–	AGL71037 (motif CSYC TP)	AGL71038
	H. pylori UM298	–	–	–	–	present, but not distinguished	AGR62414 (motif CPHC VP)	AGR61986	–	–	AGR62386	–	AGR63014 (motif CSYC TP)	AGR63015
	H. pylori UM299	–	–	–	–	present, but not distinguished	AGL68277 (motif CPHC VP)	AGL67729	–	–	AGL68241	–	AGL67474 (motif CSYC TP)	AGL67475
	H. pylori v225d	–	–	–	–	ADI34683	ADI34343 (motif CPHC VP)	ADI34684	–	–	ADI34374	–	ADI35141 (motif CHYC TP)	ADI35140
	H. pylori XZ274	–	–	–	–	AFJ81735	AFJ81241 (motif CPHC VP)	AFJ81734	–	–	present, but not distinguished	–	AFJ81977 (motif CSYC TP)	AFJ81976
Wolinella	W. succinogenes DSM 1740	–	–	–	–	–	NP_907869 (motif CPYC VP) NP_907961 (motif CPYC VP)	–	–	–	NP_907635	NP_906342 (motif CPPC IP) NP_906814 (motif CLSC IP)	NP_908252 (motif CIYC TP)	NP_908253 NP_907171 NP_906630
